# Supplementary material
Source: publisher figshare collection journal article supplement (https://springernature.figshare.com/ndownloader/files/22008741)
Supplement: Supplementary file [file 22008741]

### Additional file 3 Summary of characteristics of included publications

#### Peer reviewed intervention studies

| ID # | Authors and reference numbers [#]                                                    | Name              | Group characteristics (all groups)                             | Setting                | Design             | Delivered mode                                          | Duration and timing of walking group component                                 | Physical activity assessment  | Measurements                                             | Delivered by               |
|------|--------------------------------------------------------------------------------------|-------------------|----------------------------------------------------------------|------------------------|--------------------|---------------------------------------------------------|--------------------------------------------------------------------------------|-------------------------------|----------------------------------------------------------|----------------------------|
| 1    | Adams <i>et al.</i> [35]                                                             | Not stated        | African American women (n = 29). Mean age: 48.75               | Religious organisation | Pre-experimental   | Self-help manuals (Stanford Walking Kit)                | Once per week, for 6 weeks (flexible vs. fixed timings)                        | IPAQ-SF <sup>1</sup>          | Baseline 7 weeks                                         | Researcher                 |
| 2    | Baker <i>et al.</i> [56]                                                             | Not stated        | Overweight or obese adults (n = 45). Ages: 23 to 63            | Community              | Pre-experimental   | Not stated                                              | Weekdays, for 8 weeks                                                          | Pedometers                    | Baseline 8 weeks                                         | Not stated                 |
| 3    | Bang <i>et al.</i> [55]                                                              | Not stated        | Students (n = 118). Mean age: 24.3                             | Higher educational     | Quasi-experimental | Education lectures, Self-help manuals, Reminder texts   | Once per week for 1 hour, for 6 weeks                                          | IPAQ-SF Fitbits               | Baseline 7 weeks 3 months                                | Not stated                 |
| 4    | Bowen <i>et al.</i> [46]                                                             | Not stated        | Adults in public housing (n = 102). Ages: 18 to 76             | Community              | Quasi-experimental | Not stated                                              | At least once per week, for 12 weeks                                           | Pedometers                    | Baseline 12 weeks                                        | Professionals <sup>2</sup> |
| 5    | Coulon <i>et al.</i> [36], Siceoff <i>et al.</i> [42], Wilson <i>et al.</i> [44, 45] | PATH <sup>3</sup> | Underserved African American adults (n = 434). Mean age: 51.19 | Community              | RCT <sup>1</sup>   | Education events, Social marketing resources, Calendar  | Six days per week (not Sundays), for 12 months                                 | Pedometers Accelerometers     | Baseline 12 months 18 months 24 months                   | Lay people <sup>4</sup>    |
| 6    | Dodd <i>et al.</i> [48]                                                              | LIMIT             | Overweight or obese antenatal women (n = 582). Mean age: 29.4  | Hospital               | Nested RCT         | One-to-one sessions, Self-help manuals, Telephone calls | 3 times per week for 40 mins, for 10-20 weeks gestation to 4 months postpartum | SQUASH <sup>1</sup> Workbooks | Baseline, 28 and 36 weeks gestation, 4 months postpartum | Researcher                 |

|    |                                                                                                |                            |                                                                           |                           |                                                |                                                 |                                                  |                                                                                                               |                                            |                             |
|----|------------------------------------------------------------------------------------------------|----------------------------|---------------------------------------------------------------------------|---------------------------|------------------------------------------------|-------------------------------------------------|--------------------------------------------------|---------------------------------------------------------------------------------------------------------------|--------------------------------------------|-----------------------------|
| 7  | Gilinsky [49]<br>Lee <i>et al.</i> [80]                                                        | MAMMiS <sup>3</sup>        | Postnatal women<br>(n = 65). Mean age<br>= 33.1                           | Community                 | RCT                                            | One-to-one<br>sessions,<br>Self-help<br>manuals | Once per week<br>for 30-50 mins,<br>for 10 weeks | Pedometers<br>Accelerometers<br>7-day recall<br>questionnaire                                                 | Baseline<br>3 months<br>6 months           | Professionals               |
| 8  | Gusi <i>et al.</i><br>[50]                                                                     | ELAY <sup>3</sup>          | Older adults (n =<br>3,214). Mean age<br>= 68.63                          | Community                 | RCT                                            | Not stated                                      | 3 times per week<br>for 50 mins, for<br>6 months | Functional<br>reach, chair sit-<br>and-reach, 3-m<br>TUG <sup>1</sup> , bi-<br>handgrips, 6-<br>min walk test | Baseline<br>6 months<br>12 months          | Professionals               |
| 9  | Izumi <i>et al.</i><br>[37]<br>Kwarteng <i>et al.</i> [39]<br>Schulz <i>et al.</i><br>[40, 41] | WYHH <sup>3</sup>          | Adults (n = 603).<br>Mean age = 40.75<br>years.                           | Community                 | Mixed<br>methods<br>(including<br>cluster RCT) | Not stated                                      | 3 times per week<br>for 90 mins, for<br>32 weeks | Pedometers                                                                                                    | Baseline<br>4 weeks<br>8 weeks<br>32 weeks | Professionals<br>Lay people |
| 10 | Jacobsen [57]                                                                                  | Not stated                 | Adults (n = 7)                                                            | Religious<br>organisation | Pre-<br>experimental                           | Self-help<br>manuals                            | Twice per week,<br>duration not<br>stated        | Pedometers                                                                                                    | Not stated                                 | Lay people                  |
| 11 | Keller <i>et al.</i><br>[38]<br>Vega-Lopez <i>et al.</i> [37]                                  | Madres<br>para la<br>Salud | Sedentary<br>postpartum<br>Hispanic women<br>(n = 44). Mean age<br>= 28.2 | Community                 | RCT                                            | Group<br>support<br>sessions                    | Once per week<br>for 30 mins, for<br>12 weeks    | SBAS <sup>1</sup><br>Pedometers<br>Accelerometers                                                             | Baseline<br>6 months<br>12 month           | Professionals               |
| 12 | Kinnaick <i>et al.</i> [79]<br>Thøgersen-<br>Ntoumani <i>et al.</i> [52-54]                    | Step by<br>Step            | Adults (n = 75)                                                           | Workplace                 | Mixed<br>methods<br>(including<br>RCT)         | Reminder<br>texts                               | 3 times per week<br>for 30 mins, for<br>10 weeks | Self-report<br>diaries<br>Pedometers                                                                          | Baseline to<br>16 weeks                    | Lay people                  |

|    |                             |                   |                                         |           |                  |                                           |                                            |                                    |                   |                             |
|----|-----------------------------|-------------------|-----------------------------------------|-----------|------------------|-------------------------------------------|--------------------------------------------|------------------------------------|-------------------|-----------------------------|
| 13 | Pelssers <i>et al.</i> [51] | Every Step Counts | Older adults (n = 580). Mean age = 69.6 | Community | RCT              | Group support sessions, Self-help manuals | Once per week, for 10 weeks                | GLTEQ <sup>1</sup> 6-min walk test | Baseline 10 weeks | Lay people                  |
| 14 | Subitha <i>et al.</i> [47]  | Not stated        | Adults (n = 458). Ages: 20 to 49        | Community | Pre-experimental | One-to-one sessions, self-help manuals    | 4 times per week for 30 mins, for 10 weeks | IPAQ                               | Baseline 10 weeks | Professionals<br>Lay people |

<sup>1</sup>**List of measurement abbreviations:** IPAQ-SF: International Physical Activity Questionnaire Short Form; RCT: randomised controlled trial; SQUASH: Short Questionnaire to Assess Health-enhancing Physical Activity; TUG: Timed Up-and-Go test; SBAS: Stanford Brief Activity Survey; GLTEQ: Godin Leisure Time Exercise Questionnaire

<sup>2</sup>**Professionals** = people who have previous education and work on behaviour change interventions as part of their profession.

<sup>3</sup>**List of intervention name abbreviations:** PATH: Positive Action for Today's Health; ELAY: Exercise Looks After You; WYHH: Walk Your Heart to Health

<sup>4</sup>**Lay people** = people who received basic training to deliver the intervention, that is not part of their professional role.

### Additional peer reviewed studies which considered components of outdoor walking groups

| ID # | Authors and reference numbers [#]                                                     | Design                                    | Sample characteristics                                                                               | Measures or topic(s) of investigation                                            | Description of programme(s) or intervention(s) studied                                                                                                                                           | Name                | Setting    | Duration and timing of walking group component       |
|------|---------------------------------------------------------------------------------------|-------------------------------------------|------------------------------------------------------------------------------------------------------|----------------------------------------------------------------------------------|--------------------------------------------------------------------------------------------------------------------------------------------------------------------------------------------------|---------------------|------------|------------------------------------------------------|
| 15   | Anderson-Lewis <i>et al.</i> [91]                                                     | Mixed methods                             | Research staff (n = 14)<br>Advisory board (n = 18)<br>Walking coaches (n = 29)                       | Community capacity                                                               | Community-based participatory, multi-component intervention, targeting African Americans. Delivered by lay people, using culturally tailored education sessions, health screening and pedometers | HUB City Steps      | Community  | At least twice per month for 90 mins, for 12 months. |
| 16   | Capalb <i>et al.</i> [72]                                                             | Qualitative                               | Walking group participants (n = 10).<br>Ages: 60 to 85                                               | Barriers and facilitators                                                        | Multi-component health intervention delivered by trained instructors. Included a variety of exercises                                                                                            | Not stated          | Community  | 6 months                                             |
| 17   | Doughty [92]                                                                          | Ethnography                               | Walking group participants (n = 40)<br>Ages: 20 to 79                                                | Embodied social practices and therapeutic landscapes                             | Five different lay led walking groups within the UK countryside                                                                                                                                  | Not stated          | Not stated | Not stated                                           |
| 18   | Forthofer <i>et al.</i> [64], Schoffman <i>et al.</i> [83], Wilcox <i>et al.</i> [84] | Mixed methods                             | Community members (n = 62)<br>Walking group participants (n = 236)<br>Walking group leaders (n = 60) | Programme features<br>Demographic characteristics<br>Outdoor recreation area use | Programme encouraged lay walking leaders to recruit members through existing social networks and organise walking groups on an <i>ad hoc</i> basis                                               | SCOTM! <sup>1</sup> | Community  | 6 months                                             |
| 19   | Grant <i>et al.</i> [15, 73]                                                          | Ethnography                               | Walking group participants (n = 19)                                                                  | Qualitative value of walking groups for older adults                             | Walking groups delivered by the researcher, as part of national UK programme, which offers a range of intensity walks which are either open access or targeted                                   | Walking for Health  | Community  | Several per week for 75-90 mins, ongoing             |
| 20   | Hanson and Jones [62]                                                                 | Quantitative (secondary/cross-sectional). | Not applicable                                                                                       | Health and socio-economic population need                                        | Lay led walking groups, as part of national UK programme, which offers a range of intensity walks which are either open access or targeted                                                       | Walking for Health  | Community  | Various frequencies, 30-90 mins, ongoing             |

|    |                                     |                                          |                                                               |                                                                                                             |                                                                                                                                            |                    |           |                                              |
|----|-------------------------------------|------------------------------------------|---------------------------------------------------------------|-------------------------------------------------------------------------------------------------------------|--------------------------------------------------------------------------------------------------------------------------------------------|--------------------|-----------|----------------------------------------------|
| 21 | Hanson <i>et al.</i> [85]           | Qualitative                              | Group stakeholders (n = 12)<br>Walking champions (n = 9)      | Programme logistics                                                                                         | Community walking groups delivered as part of a national programme by lay people. Targeted at those from low socioeconomic backgrounds     | Walking Cities     | Community | 3-4 times per week, for 15 months            |
| 22 | Hanson <i>et al.</i> [8]            | Qualitative                              | Walking group participants (n = 10)                           | Barriers and facilitators                                                                                   | Community walking groups delivered by a trained physical activity leader. Targeted at those from low socioeconomic backgrounds             | Not stated         | Community | 1-2 times per week for 50 mins, for 12 weeks |
| 23 | Kassavou <i>et al.</i> [67, 68, 74] | Mixed methods                            | Walk leaders (n = 18)<br>Walking group participants (n = 122) | Environmental influences<br>Walkers' needs and expectations<br>Self-efficacy<br>Habituation<br>Satisfaction | Lay led walking groups, as part of national UK programme, which offers a range of intensity walks which are either open access or targeted | Walking for Health | Community | Various frequencies, 30-90 mins, ongoing     |
| 24 | Kokolakakis <i>et al.</i> [68]      | Quantitative (secondary/cross-sectional) | Walking group participants (n = 64,933)                       | Barriers and facilitators<br>Attendance patterns                                                            | Lay led walking groups, as part of national UK programme, which offers a range of intensity walks which are either open access or targeted | Walking for Health | Community | Various frequencies, 30-90 mins, ongoing     |
| 25 | Lord and Bush [78]                  | Qualitative                              | Male walking group participants (n = 184)                     | Barriers and facilitators                                                                                   | Groups were established out of three pre-existing men's well-being groups                                                                  | Not stated         | Community | 24 weeks                                     |
| 26 | Marselle <i>et al.</i> [110]        | Quantitative (secondary/longitudinal)    | Walking group participants (n = 1,516)                        | Well-being                                                                                                  | Lay led walking groups, as part of national UK programme, which offers a range of intensity walks which are either open access or targeted | Walking for Health | Community | Various frequencies, 30-90 mins, ongoing     |
| 27 | Marselle <i>et al.</i> [33]         | Quantitative (secondary/cross-sectional) | Walking group participants (n = 708)                          | Well-being                                                                                                  | Lay led walking groups, as part of national UK programme, which offers a range of intensity walks which are either open access or targeted | Walking for Health | Community | Various frequencies, 30-90 mins, ongoing     |

|    |                                                               |                                          |                                                                          |                                              |                                                                                                                                                                 |                    |            |                                          |
|----|---------------------------------------------------------------|------------------------------------------|--------------------------------------------------------------------------|----------------------------------------------|-----------------------------------------------------------------------------------------------------------------------------------------------------------------|--------------------|------------|------------------------------------------|
| 28 | Marselle <i>et al.</i> [93]<br>Marselle <i>et al.</i> , [111] | Quantitative (primary/longitudinal)      | Walking group participants (n = 127)                                     | Well-being                                   | Lay led walking groups, as part of national UK programme, which offers a range of intensity walks which are either open access or targeted                      | Walking for Health | Community  | Various frequencies, 30-90 mins, ongoing |
| 29 | Matthews <i>et al.</i> [112]                                  | Qualitative                              | Walking group coordinators (n = 28)                                      | Recruitment strategies                       | Considered programmes delivered by three agencies across England and Scotland                                                                                   | Not stated         | Not stated | Not stated                               |
| 30 | Raine <i>et al.</i> [34]                                      | Qualitative                              | Walking group participants (n = 8)<br>Walking leaders (n = 6)            | Barriers and facilitators                    | Recruited from a programme facilitated by Stepping Stones to Nature and the YMCA                                                                                | Not stated         | Not stated | Not stated                               |
| 31 | South <i>et al.</i> [71]                                      | Mixed methods                            | Walking group participants (n = 77)<br>Walking group befrienders (n = 2) | Barriers and facilitators<br>Well-being      | Lay led walking groups, as part of national UK programme, which offers a range of intensity walks which are either open access or targeted                      | Walking for Health | Community  | Various frequencies, 30-90 mins, ongoing |
| 32 | Van Wormer <i>et al.</i> [82]                                 | Quantitative (secondary/cross-sectional) | Adults (n = 642)                                                         | Physical activity<br>Programme participation | A multi-component worksite walking and dietary intervention including clubs which were coordinated by researchers and staff. Group walks were held periodically | HealthWorks        | Workplace  | 7 blocks of 6-8 weeks, for 24 months     |

<sup>1</sup>List of intervention name abbreviations: SCOTM!: Sumter County on the Move!

### Non-peer reviewed publications

| ID # | Authors and reference numbers [#]       | Type                    | Purpose of study or publication                                                          | Description of programme(s) or intervention(s) studied                                                                                                                                                   | Name                     | Setting   | Research design for collated data      |
|------|-----------------------------------------|-------------------------|------------------------------------------------------------------------------------------|----------------------------------------------------------------------------------------------------------------------------------------------------------------------------------------------------------|--------------------------|-----------|----------------------------------------|
| 33   | Cronin [58]                             | Programme evaluation    | To audit and provide an analysis of the programme for 2015-16                            | Lay led walking groups, as part of national UK programme, which offers a range of intensity walks which are either open access or targeted                                                               | Walking for Health       | Community | Quantitative (primary/cross-sectional) |
| 34   | De Moor <i>et al.</i> [19]              | Programme evaluation    | To audit the programme for 2012                                                          | Lay led walking groups, as part of national UK programme, which offers a range of intensity walks which are either open access or targeted                                                               | Walking for Health       | Community | Quantitative (primary/cross-sectional) |
| 35   | France <i>et al.</i> [65]               | Programme evaluation    | Provide evidence of the programme's impact on health to commissioners                    | Lay led walking groups, as part of national UK programme, which offers a range of intensity walks which are either open access or targeted                                                               | Walking for Health       | Community | Mixed methods                          |
| 19   | Grant [94]*                             | Ethnographic evaluation | To provide programme agencies with participants' perceived value of their walking groups | Walking groups delivered by the researcher, as part of national UK programme, which offers a range of intensity walks which are either open access or targeted                                           | Walking for Health       | Community | Ethnography                            |
| 36   | Heart Foundation [20]                   | Programme evaluation    | To provide an overview of programme achievements for 2012                                | Locally coordinated, lay-led walking groups, as part of a national network in Australia. Walkers can join an online community and receive incentives for completed walks. Either open access or targeted | Heart Foundation Walking | Community | Mixed methods                          |
| 37   | Heart Foundation [61], Wilson, [60, 81] | Programme evaluation    | To provide an overview of programme achievements for 2015-16                             | Locally coordinated, lay-led walking groups, as part of a national network in Australia. Walkers can join an online community and receive incentives for completed walks. Either open access or targeted | Heart Foundation Walking | Community | Mixed methods                          |

|    |                            |                           |                                                                                           |                                                                                                                                                                                                          |                                |           |                                        |
|----|----------------------------|---------------------------|-------------------------------------------------------------------------------------------|----------------------------------------------------------------------------------------------------------------------------------------------------------------------------------------------------------|--------------------------------|-----------|----------------------------------------|
| 38 | Phan <i>et al.</i> [87]    | Policy and practice brief | To support planning and policies that promote walking, and provide policy recommendations | Led by an active group of parents, who assess and remove barriers to safe walking.                                                                                                                       | Get Moving Kern and Greenfield | Community | Case study                             |
| 39 | Philips <i>et al.</i> [14] | Programme evaluation      | To identify if the proportion of active participants had increased                        | Lay led walking groups, as part of national UK programme, which offers a range of intensity walks which are either open access or targeted                                                               | Walking for Health             | Community | Mixed methods                          |
| 40 | Schofield [59]             | Programme report          | To showcase programmes from rural communities                                             | Locally coordinated, lay-led walking groups, as part of a national network in Australia. Walkers can join an online community and receive incentives for completed walks. Either open access or targeted | Heart Foundation Walking       | Community | Case study                             |
| 41 | Scott and Cronin [63]      | Programme evaluation      | To provide an overview of programme delivery in 2016                                      | Lay led walking groups, as part of national UK programme, which offers a range of intensity walks which are either open access or targeted                                                               | Walking for Health             | Community | Quantitative (primary/cross-sectional) |
| 31 | South <i>et al.</i> [70]*  | Programme evaluation      | To report the effectiveness of the Walking for Wellness pilot to stakeholders             | Walking groups delivered by the researcher, as part of national UK programme, which offers a range of intensity walks which are either open access or targeted                                           | Walking for Health             | Community | Mixed methods                          |

\* These papers are additional non-peer reviewed reports from studies detailed under additional peer reviewed publications. As such these have no unique identifying numbers and are not considered as separate research designs in the manuscript.
